# Supplementary material for: Dot1l interacts with Zc3h10 to activate Ucp1 and other thermogenic genes
Source: eLife journal article supplement (doi:10.7554/elife.59990), 2020-10-27

Figure 1- figure supplement 1. Dot1l directly interacts with Zc3h10 for UCP1 promoter activation

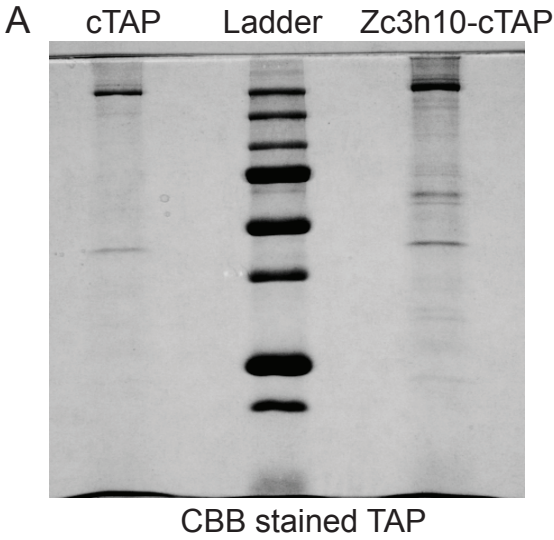

Candidate proteins identified by TAP-Mass spec:

- Dot1l
- Phb
- Smarca4
- Smarca5
- Snw1
- Fus

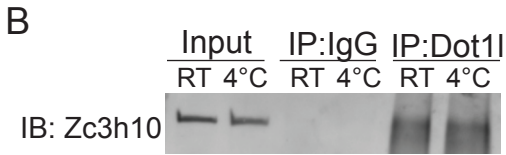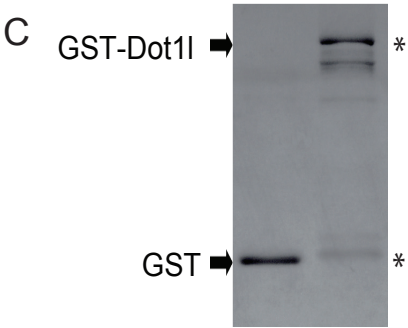

Supplement: supp [file elife-59990-supp-v1.zip]
