# Supplementary figures and images for: Dot1l interacts with Zc3h10 to activate Ucp1 and other thermogenic genes
Source: eLife journal article supplement (doi:10.7554/elife.59990), 2020-10-27

Figure 2- figure supplement 1. Dot1l promotes the thermogenic gene program in vitro

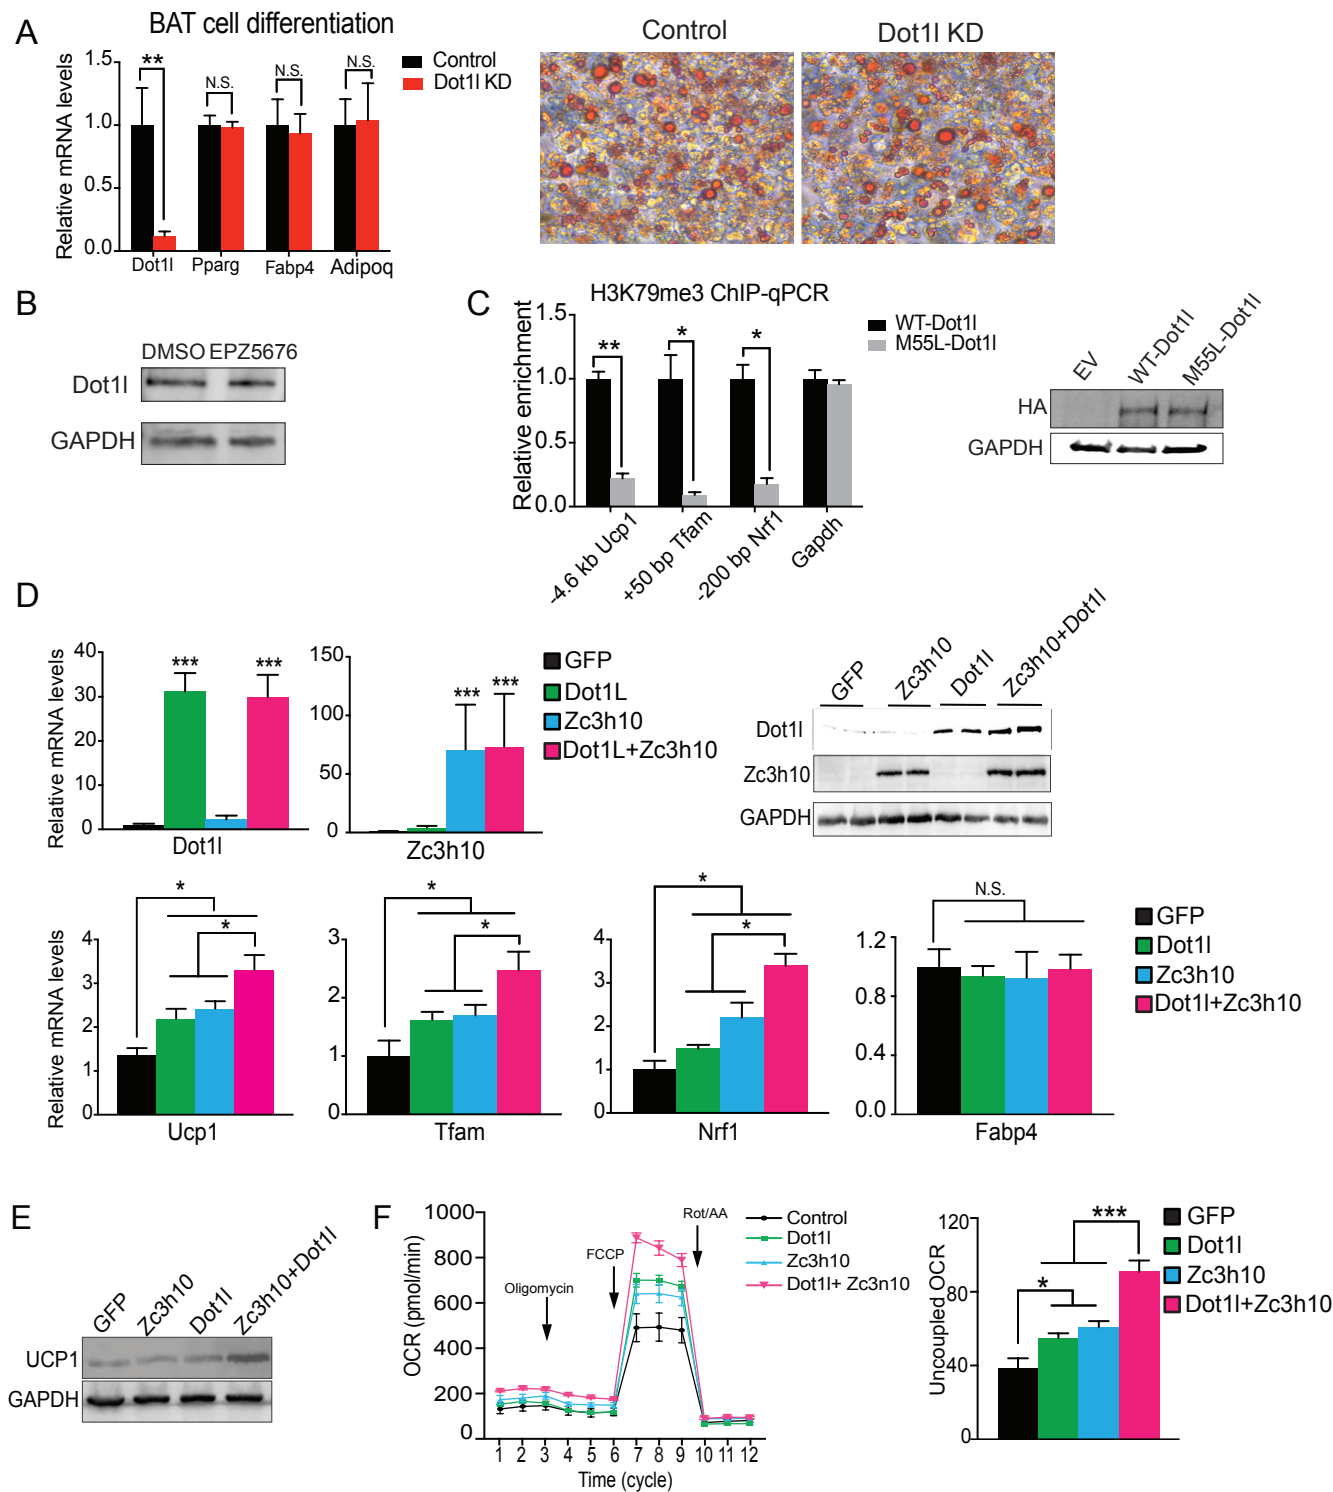

Supplement: supp [file elife-59990-supp-v1.zip]

Figure 3-figure supplement 1. Inhibition of Dot1l activity impairs BAT gene program in vivo

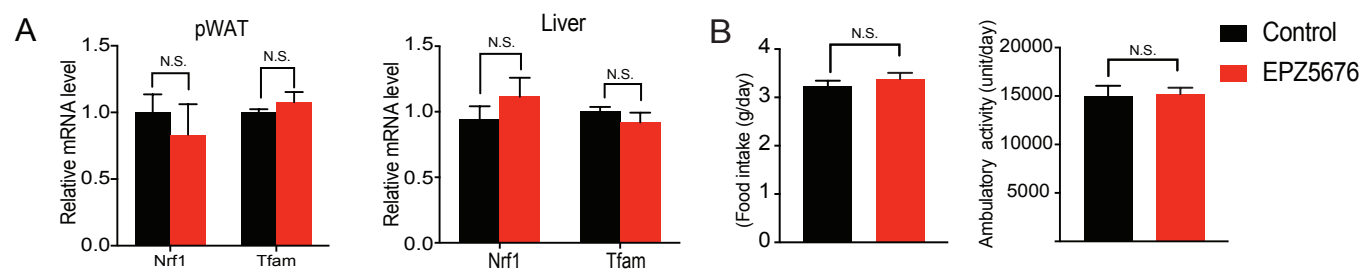

Supplement: supp [file elife-59990-supp-v1.zip]

Figure 4-figure supplement1. Dot1l is required for cold-induced thermogenesis in mice

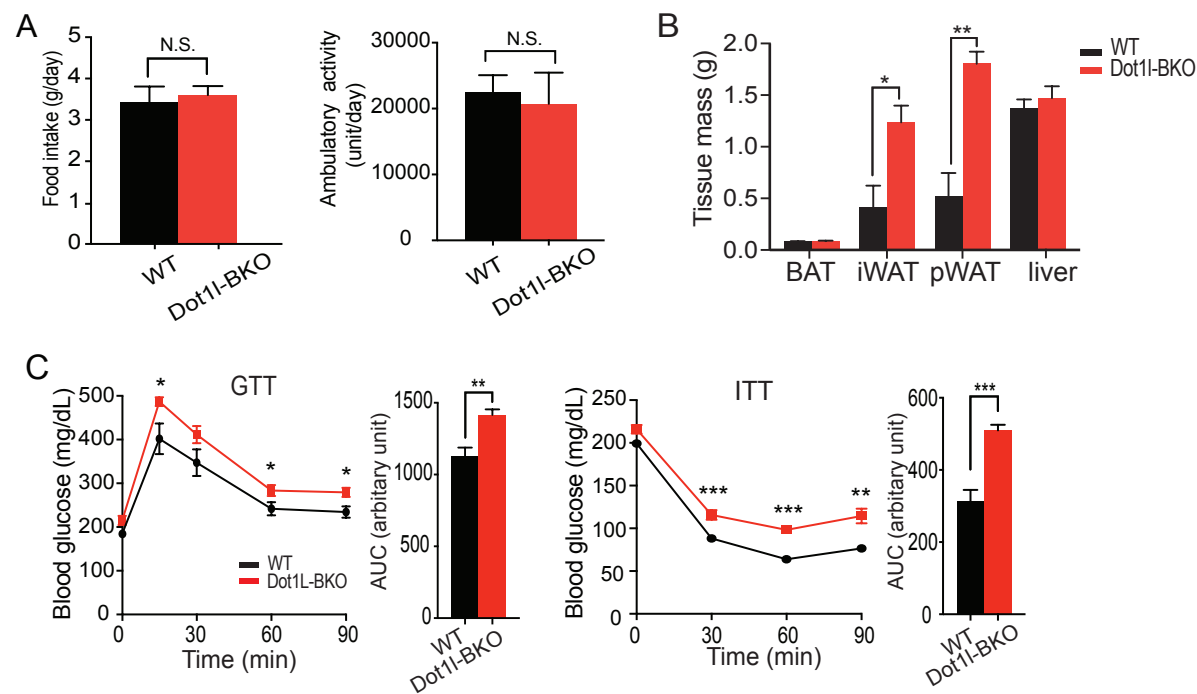

Supplement: supp [file elife-59990-supp-v1.zip]
